# Supplementary material for: Enhanced kinase translocation reporters for simultaneous real-time measurement of PKA, ERK, and Ca2+
Source: PubMed Central journal article supplement (PMC11475874; doi:10.1101/2024.09.30.615856), 2024-10-02
Supplement: NIHPP2024.09.30.615856v1-supplement-8.pdf [file NIHPP2024.09.30.615856v1-supplement-8.pdf]

## SUPPLEMENTAL INFORMATION

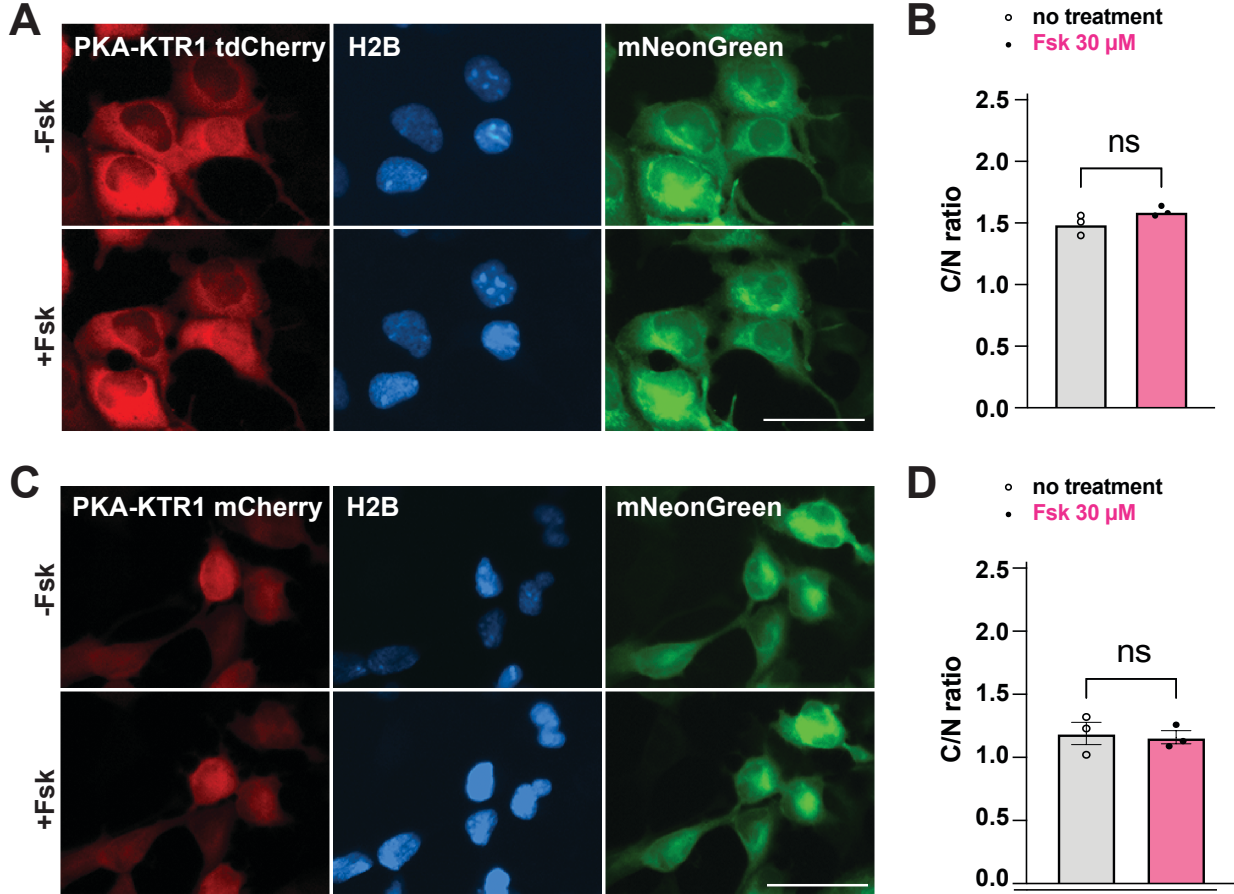

**Figure S1. The PKA-KTR1 sensor domain does not drive Fsk-induced protein translocation to the cytoplasm.** HEK293 cells were transfected with plasmids designed to co-express H2B-mTagBFP2, mNeonGreen, and (A, B) PKA-KTR1/tdCherry (~64 kDa), or (C, D) PKA-KTR1-mCherry (~32 kDa). (A) Fluorescence micrographs of HEK293 expressing cells expressing PKA-KTR1/tdCherry before and after 30 minutes incubation in 30  $\mu$ M Fsk. Bar, 50  $\mu$ M. (B) Bar plot of PKA-KTR1/tdCherry C/N ratio before and after addition of after 30 minutes incubation in 30  $\mu$ M Fsk. (C) Fluorescence micrographs of HEK293 expressing cells expressing PKA-KTR1/mCherry before and after 30 minutes incubation in 30  $\mu$ M Fsk. Bar, 50  $\mu$ M. (D) Bar plot of PKA-KTR1/mCherry C/N ratio before and after addition of after 30 minutes incubation in 30  $\mu$ M Fsk. Data are from a minimum of three independent biological replicates.

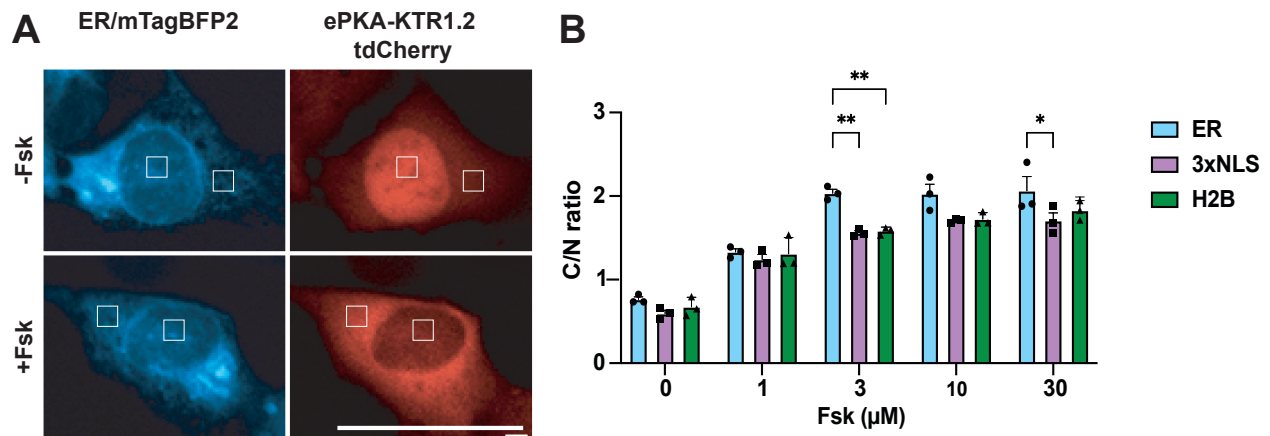

**Figure S2. Marking nucleus and cytoplasm with ER-mTagBFP2.** (A) Fluorescence micrographs of HEK293 cells co-expressing ER-mTagBFP2 and ePKA-KTR1.2/tdCherry. The distribution of ER-mTagBFP2 determines the positioning of ‘counting areas’ (white boxes) that are then used to count the relative fluorescence intensity of KTR proteins in the nucleus and cytoplasm, with the C/N ratio determined from the average fluorescence brightness of all pixels within each counting area. (B) C/N ratios of ePKA-KTR1.2 in HEK293 cells co-expressing (blue bars) the ER-mTagBFP2 marker (ER), (purple bars) the 3xNLS-mTagBFP2 marker (3xNLS), or (green bars) the H2B-mTagBFP2 marker (H2B). Cells were exposed to 0, 1, 3, 10, or 30  $\mu\text{M}$  Fsk for 30 minutes, imaged by fluorescence microscopy, and C/N ratios were calculated from digital images. Data are from a minimum of three independent biological replicates. ANOVA  $p$  values are denoted by \*  $<0.05$ , and \*\*  $<0.01$ .

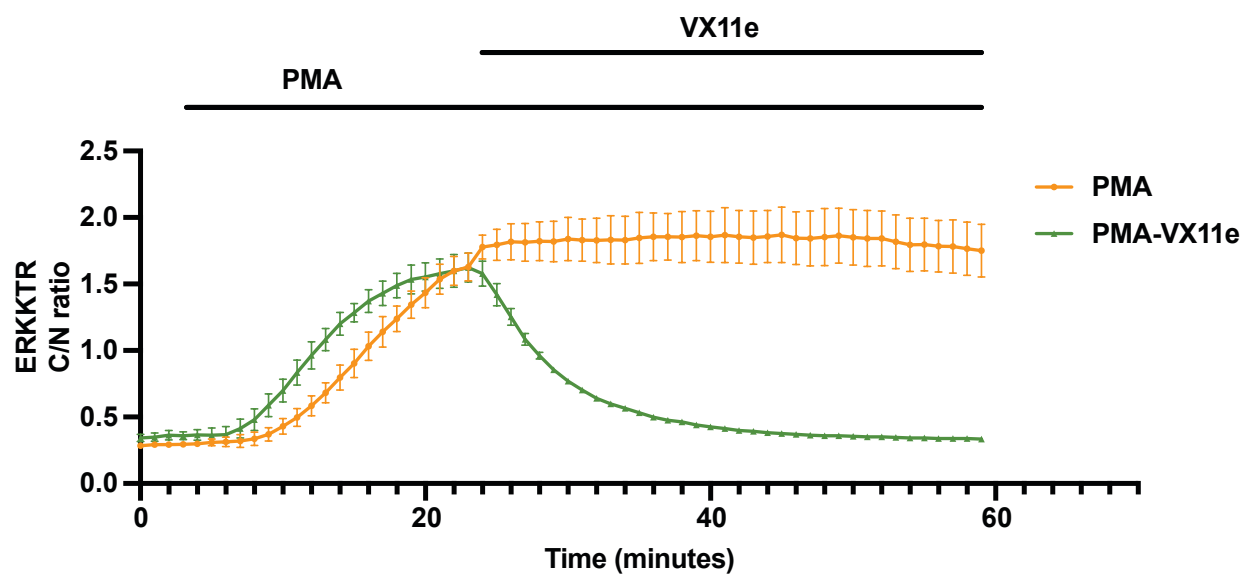

**Figure S3. Response of eERK-KTR1.2/emiRFP670 to PMA, and to PMA then VX11e.** HEK293 cells expressing eERK-KTR1.2/emiRFP670 were imaged every 60 sec (orange) in response to PMA alone or (green) in response to PMA, followed 20 min later by addition of VX11e. Data are from a minimum of three independent biological replicates.

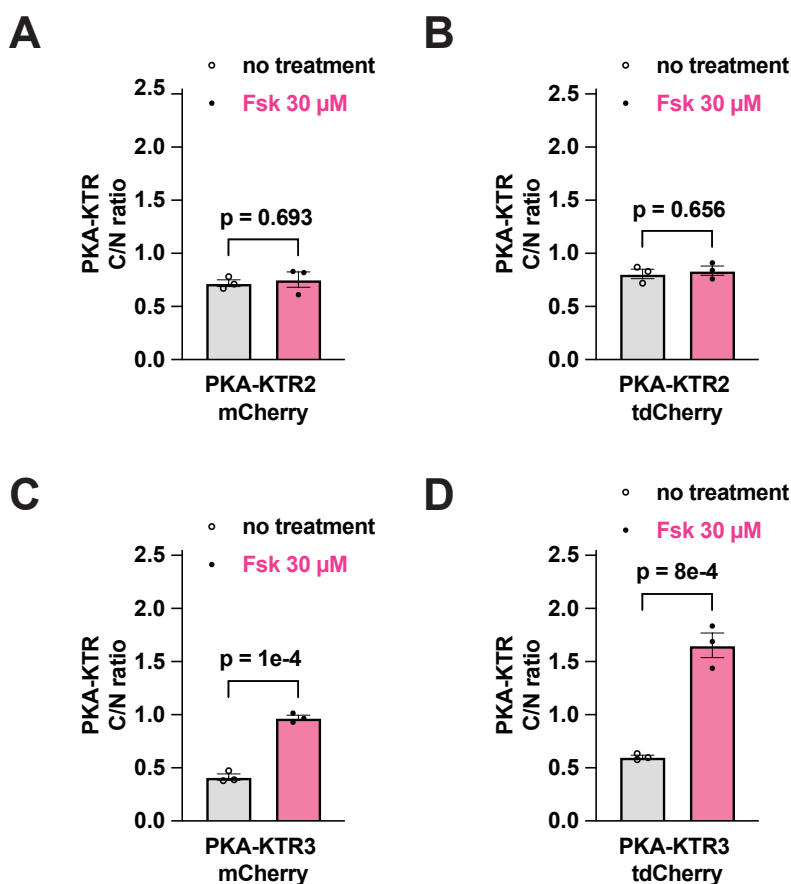

**Figure S4. Increasing KTR size triples the dynamic range of PKA-KTR3.** HEK293 cells were transfected with plasmid vectors designed to express fusion proteins comprised of the sensor domains of PKA-KTR2(28) or PKA-KTR3(29) appended to the N-terminus of either mCherry, tdCherry. Two days later, cells were imaged by fluorescence microscopy prior to or after a 30 min. incubation in 30 mM Fsk, followed by calculation of C/N ratios in 10 cells in independent regions of interest (ROIs) from three biological replicates, shown here in bar graph form. (A, B) Both PKA-KTR2/mCherry, a ~34 kDa proteins, and PKA-KTR2/tdCherry, a ~64 kDa protein, had resting C/N ratios <1, and neither showed a Fsk-induced translocation to the cytoplasm. (C) PKA-KTR3/mCherry, a ~34 kDa protein, displayed a low resting C/N ratio and moved to the cytoplasm in response to Fsk, confirming that the PKA-KTR3 sensor domain is a useful reporter of PKA activity. However, Fsk-induced C/N ratio of PKA-KTR3/mCherry remained <1, and its dynamic range was relatively narrow, only ~2-fold. (D) In contrast, we found that PKA-KTR3/tdCherry, ~64 kDa, had a broader dynamic range, ~3-fold, showing once again that increasing KTR size can be sufficient to improve KTR performance characteristics. Data are from a minimum of three independent biological replicates. ANOVA *p* values are denoted by \*\*\* <0.001.

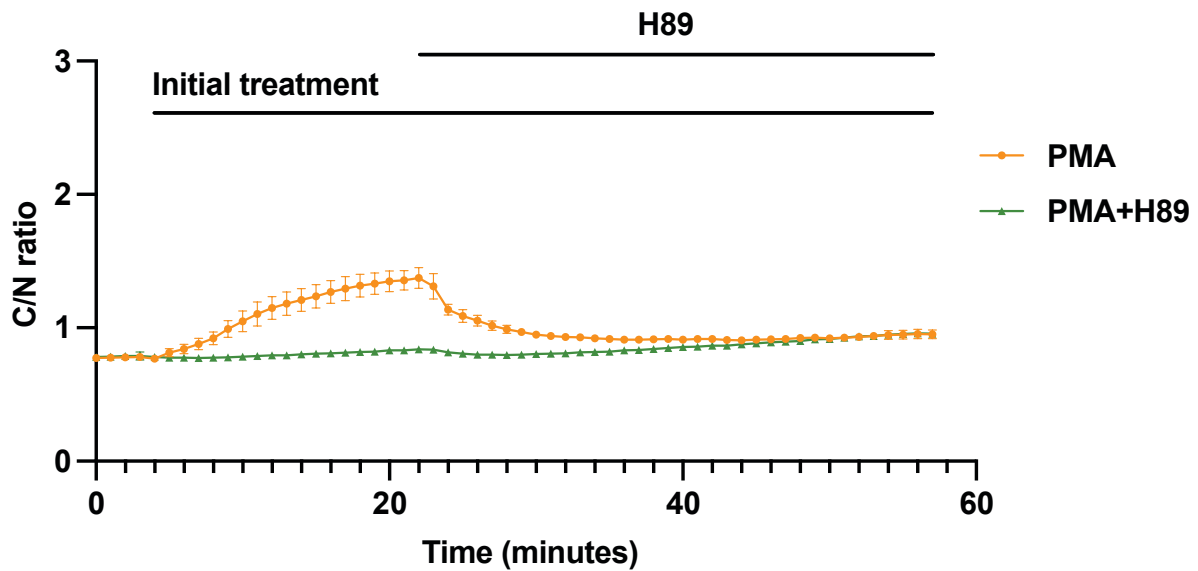

**Figure S5. PMA induces a mild activation of PKA.** Plot of C/N ratios for ePKA-KTR1.2/tdTomato C/N at every minute in ePKA-KTR1.2/tdTomato-expressing HEK293 cells exposed to (orange) PMA at t = 3 min, followed by the addition of the PKA inhibitor H89 at t = 23, or (green) PMA and H89 at t = 3, followed by addition of H89 again at t = 23 min.



|                                         |                                                                                                                                                                                                                                                                                                                                                                                                                                                                                                                                                                                                                                                                                                                                                                                                                                                                                                                                                                                                                                                                                                                         |             |         |
|-----------------------------------------|-------------------------------------------------------------------------------------------------------------------------------------------------------------------------------------------------------------------------------------------------------------------------------------------------------------------------------------------------------------------------------------------------------------------------------------------------------------------------------------------------------------------------------------------------------------------------------------------------------------------------------------------------------------------------------------------------------------------------------------------------------------------------------------------------------------------------------------------------------------------------------------------------------------------------------------------------------------------------------------------------------------------------------------------------------------------------------------------------------------------------|-------------|---------|
|                                         | <p>TLYPADGGLEGRNDMALKLVGGSHLIANAKTYYRSKPKAKNLKMPGVVYVDYRLERIKEANNETYVEQHEVAVARYCDL<br/>PSKLGHLKNGMDELYKGRSPGLNGSGATNFSLLKQAGDVEENPG</p>                                                                                                                                                                                                                                                                                                                                                                                                                                                                                                                                                                                                                                                                                                                                                                                                                                                                                                                                                                                 |             |         |
| ePKA-KTR1.3 /tdCherry.2a .H2B-mTagBF P2 | <p>MEMPEEPANSGHSLPPVYIYSPEYVSI CDSLKVKPKRASMVNEDEAPAKRRASLVGSSRLERLTLQSSGAPVSKGEEDN<br/>MAI I KEFMRFKVHMEGSVNGHEFE I BEGEGRPEYEGTQAKLKVTKGGPLPFAWDILSPQFMYGSKAYVKHPADIPDY<br/>KLSFPFEGFKWERVMNFEDGGVVTVDQSSLDQGEFIYKVKLRGTNFPDGPVPMQKKTMGWEASSERMPEDGALKGEIK<br/>QRLKLDGGHYDAEVKTTYKAKKPVQLPGAYNVNLIKLDITSHNEDYTI VEQYERAEGRHSTGGMDELYKARGSGATSAT<br/>MVSKGEEDNMAI I KEFMRFKVHMEGSVNGHEFE I BEGEGRPEYEGTQAKLKVTKGGPLPFAWDILSPQFMYGSKAYVK<br/>HPADIPDYKLSFPFEGFKWERVMNFEDGGVVTVDQSSLDQGEFIYKVKLRGTNFPDGPVPMQKKTMGWEASSERMP<br/>EDGALKGEIKQRLKLDGGHYDAEVKTTYKAKKPVQLPGAYNVNLIKLDITSHNEDYTI VEQYERAEGRHSTGGMDELYK<br/>ASGSGATNFSLLKQAGDVEENPG &lt; . . . &gt;   PSPAMPEPAKSAPAPKKGSKAVTKAQKGGKRRKRSRKEYSISYVYKV<br/>LKQVHPDTGISKAMGIMNSFVNDIFERIAGEASRLAHYNKRSTITSREIQTAVRLLLPGLAKHAVSEGTKAITKYTS<br/>AKDPGGSSSRVSKGEELIKENMHMKLYMEGTVDNHHFKCTSEGEKPYEGTQTMRIKVVVEGGPLPFAFDILATSFLYGS<br/>KTFINHTQGI P DFFKQSFPEGFTWERVTTYEDGGVLTATQDTSLDQDGLIYNVKIRGVNFTSNGPVMQKKTGWAEAFTE<br/>TLYPADGGLEGRNDMALKLVGGSHLIANAKTYYRSKPKAKNLKMPGVVYVDYRLERIKEANNETYVEQHEVAVARYCDL<br/>PSKLGHLKNGMDELYKGRSPGLNGSGATNFSLLKQAGDVEENPG</p>       | P C         | S 5 1 4 |
| ePKA-KTR1.4 /tdCherry.2a .H2B-mTagBF P2 | <p>MEMPEEPANSGHSLPPVYIYSPEYVSI CDSLKVKPKRASMVNEDEAPAKRRASLVGSSRLERLTLQSSGAPVSKGEED<br/>NMAI I KEFMRFKVHMEGSVNGHEFE I BEGEGRPEYEGTQAKLKVTKGGPLPFAWDILSPQFMYGSKAYVKHPADIPDY<br/>KLSFPFEGFKWERVMNFEDGGVVTVDQSSLDQGEFIYKVKLRGTNFPDGPVPMQKKTMGWEASSERMPEDGALKGEIK<br/>QRLKLDGGHYDAEVKTTYKAKKPVQLPGAYNVNLIKLDITSHNEDYTI VEQYERAEGRHSTGGMDELYKARGSGATSAT<br/>TMVSKGEEDNMAI I KEFMRFKVHMEGSVNGHEFE I BEGEGRPEYEGTQAKLKVTKGGPLPFAWDILSPQFMYGSKAYV<br/>KHPADIPDYKLSFPFEGFKWERVMNFEDGGVVTVDQSSLDQGEFIYKVKLRGTNFPDGPVPMQKKTMGWEASSERMP<br/>EDGALKGEIKQRLKLDGGHYDAEVKTTYKAKKPVQLPGAYNVNLIKLDITSHNEDYTI VEQYERAEGRHSTGGMDELYK<br/>ASGSGATNFSLLKQAGDVEENPG &lt; . . . &gt;   PSPAMPEPAKSAPAPKKGSKAVTKAQKGGKRRKRSRKEYSISYVYKV<br/>VLKQVHPDTGISKAMGIMNSFVNDIFERIAGEASRLAHYNKRSTITSREIQTAVRLLLPGLAKHAVSEGTKAITKYTS<br/>SAKDPGGSSSRVSKGEELIKENMHMKLYMEGTVDNHHFKCTSEGEKPYEGTQTMRIKVVVEGGPLPFAFDILATSFLYGS<br/>SKTFINHTQGI P DFFKQSFPEGFTWERVTTYEDGGVLTATQDTSLDQDGLIYNVKIRGVNFTSNGPVMQKKTGWAEAFTE<br/>ETLYPADGGLEGRNDMALKLVGGSHLIANAKTYYRSKPKAKNLKMPGVVYVDYRLERIKEANNETYVEQHEVAVARYCDL<br/>LPSKLGHLKNGMDELYKGRSPGLNGSGATNFSLLKQAGDVEENPG</p> | P C         | S 5 1 5 |
| ePKA-KTR1.5 /tdCherry.2a .H2B-mTagBF P2 | <p>MEMPEEPANSGHSLPPVYIYSPEYVSI CDSLKVKPKRASMVNEDEAPSKRRASLVGSSRLERLTLQSSGAPVSKGEED<br/>NMAI I KEFMRFKVHMEGSVNGHEFE I BEGEGRPEYEGTQAKLKVTKGGPLPFAWDILSPQFMYGSKAYVKHPADIPDY<br/>KLSFPFEGFKWERVMNFEDGGVVTVDQSSLDQGEFIYKVKLRGTNFPDGPVPMQKKTMGWEASSERMPEDGALKGEIK<br/>QRLKLDGGHYDAEVKTTYKAKKPVQLPGAYNVNLIKLDITSHNEDYTI VEQYERAEGRHSTGGMDELYKARGSGATSAT<br/>TMVSKGEEDNMAI I KEFMRFKVHMEGSVNGHEFE I BEGEGRPEYEGTQAKLKVTKGGPLPFAWDILSPQFMYGSKAYV<br/>KHPADIPDYKLSFPFEGFKWERVMNFEDGGVVTVDQSSLDQGEFIYKVKLRGTNFPDGPVPMQKKTMGWEASSERMP<br/>EDGALKGEIKQRLKLDGGHYDAEVKTTYKAKKPVQLPGAYNVNLIKLDITSHNEDYTI VEQYERAEGRHSTGGMDELYK<br/>ASGSGATNFSLLKQAGDVEENPG &lt; . . . &gt;   PSPAMPEPAKSAPAPKKGSKAVTKAQKGGKRRKRSRKEYSISYVYKV<br/>VLKQVHPDTGISKAMGIMNSFVNDIFERIAGEASRLAHYNKRSTITSREIQTAVRLLLPGLAKHAVSEGTKAITKYTS<br/>SAKDPGGSSSRVSKGEELIKENMHMKLYMEGTVDNHHFKCTSEGEKPYEGTQTMRIKVVVEGGPLPFAFDILATSFLYGS<br/>SKTFINHTQGI P DFFKQSFPEGFTWERVTTYEDGGVLTATQDTSLDQDGLIYNVKIRGVNFTSNGPVMQKKTGWAEAFTE<br/>ETLYPADGGLEGRNDMALKLVGGSHLIANAKTYYRSKPKAKNLKMPGVVYVDYRLERIKEANNETYVEQHEVAVARYCDL<br/>LPSKLGHLKNGMDELYKGRSPGLNGSGATNFSLLKQAGDVEENPG</p> | P C         | S 7 4 2 |
| ePKA-KTR1.2 /mCherry.2a .ER-mTagBF P2   | <p>MEMPEEPANSGHSLPPVYIYSPEYVSI CDSLKVKPKRASMVNEDEAPSKRRASLVGSSRLERLTLQSSGAPVSKGEEDN<br/>MAI I KEFMRFKVHMEGSVNGHEFE I BEGEGRPEYEGTQAKLKVTKGGPLPFAWDILSPQFMYGSKAYVKHPADIPDY<br/>KLSFPFEGFKWERVMNFEDGGVVTVDQSSLDQGEFIYKVKLRGTNFPDGPVPMQKKTMGWEASSERMPEDGALKGEIK<br/>QRLKLDGGHYDAEVKTTYKAKKPVQLPGAYNVNLIKLDITSHNEDYTI VEQYERAEGRHSTGGMDELYKARGSGATNFS<br/>LLKQAGDVEENPG &lt; . . . &gt;   PMKLSLVAAMLLLSAARAVSKGEELIKENMHMKLYMEGTVDNHHFKCTSEGEKPYE<br/>GTQTMRIKVVVEGGPLPFAFDILATSFLYGSKTFINHTQGI P DFFKQSFPEGFTWERVTTYEDGGVLTATQDTSLDQDGLI<br/>YNVKIRGVNFTSNGPVMQKKTGWAEAFTE TLYPADGGLEGRNDMALKLVGGSHLIANAKTYYRSKPKAKNLKMPGVVY<br/>VDYRLERIKEANNETYVEQHEVAVARYCDLPSKLGHLKNDDEL</p>                                                                                                                                                                                                                                                                                                                                                                                                                                          | P L e n t i | Y G 6 1 |
| ePKA-KTR1.4 /mCherry.2a .ER-mTagBF P2   | <p>MEMPEEPANSGHSLPPVYIYSPEYVSI CDSLKVKPKRASMVNEDEAPAKRRASLVGSSRLERLTLQSSGAPVSKGEED<br/>NMAI I KEFMRFKVHMEGSVNGHEFE I BEGEGRPEYEGTQAKLKVTKGGPLPFAWDILSPQFMYGSKAYVKHPADIPDY<br/>KLSFPFEGFKWERVMNFEDGGVVTVDQSSLDQGEFIYKVKLRGTNFPDGPVPMQKKTMGWEASSERMPEDGALKGEIK<br/>QRLKLDGGHYDAEVKTTYKAKKPVQLPGAYNVNLIKLDITSHNEDYTI VEQYERAEGRHSTGGMDELYKARGSGATNFS<br/>LLKQAGDVEENPG &lt; . . . &gt;   PMKLSLVAAMLLLSAARAVSKGEELIKENMHMKLYMEGTVDNHHFKCTSEGEKPYE<br/>GTQTMRIKVVVEGGPLPFAFDILATSFLYGSKTFINHTQGI P DFFKQSFPEGFTWERVTTYEDGGVLTATQDTSLDQDGLI<br/>YNVKIRGVNFTSNGPVMQKKTGWAEAFTE TLYPADGGLEGRNDMALKLVGGSHLIANAKTYYRSKPKAKNLKMPGVVY<br/>VDYRLERIKEANNETYVEQHEVAVARYCDLPSKLGHLKNDDEL</p>                                                                                                                                                                                                                                                                                                                                                                                                                                          | P L e n t i | Y G 6 5 |
| ePKA-KTR1.4 /tdCherry.2a .ER-mTagBF P2  | <p>MEMPEEPANSGHSLPPVYIYSPEYVSI CDSLKVKPKRASMVNEDEAPAKRRASLVGSSRLERLTLQSSGAPVSKGEED<br/>NMAI I KEFMRFKVHMEGSVNGHEFE I BEGEGRPEYEGTQAKLKVTKGGPLPFAWDILSPQFMYGSKAYVKHPADIPDY<br/>KLSFPFEGFKWERVMNFEDGGVVTVDQSSLDQGEFIYKVKLRGTNFPDGPVPMQKKTMGWEASSERMPEDGALKGEIK<br/>QRLKLDGGHYDAEVKTTYKAKKPVQLPGAYNVNLIKLDITSHNEDYTI VEQYERAEGRHSTGGMDELYKARGSGATSAT<br/>TMVSKGEEDNMAI I KEFMRFKVHMEGSVNGHEFE I BEGEGRPEYEGTQAKLKVTKGGPLPFAWDILSPQFMYGSKAYV<br/>KHPADIPDYKLSFPFEGFKWERVMNFEDGGVVTVDQSSLDQGEFIYKVKLRGTNFPDGPVPMQKKTMGWEASSERMP<br/>EDGALKGEIKQRLKLDGGHYDAEVKTTYKAKKPVQLPGAYNVNLIKLDITSHNEDYTI VEQYERAEGRHSTGGMDELYK<br/>ASGSGATNFSLLKQAGDVEENPG &lt; . . . &gt;   PMKLSLVAAMLLLSAARAVSKGEELIKENMHMKLYMEGTVDNHHFKC<br/>TSEGEKPYEGTQTMRIKVVVEGGPLPFAFDILATSFLYGSKTFINHTQGI P DFFKQSFPEGFTWERVTTYEDGGVLTAT<br/>QDTSLDQDGLIYNVKIRGVNFTSNGPVMQKKTGWAEAFTE TLYPADGGLEGRNDMALKLVGGSHLIANAKTYYRSKPKA<br/>KNLKMPGVVYVDYRLERIKEANNETYVEQHEVAVARYCDLPSKLGHLKNDDEL</p>                                                                                                                                                                  | P L e n t i | Y G 6 7 |
| ePKA-KTR1.2 /mScar                      | <p>MEMPEEPANSGHSLPPVYIYSPEYVSI CDSLKVKPKRASMVNEDEAPSKRRASLVGSSRLERLTLQSSGAPVSKGEAVI<br/>KEFMRFKVHMEGSVNGHEFE I BEGEGRPEYEGTQAKLKVTKGGPLPFAWDILSPQFMYGSKAYVKHPADIPDYKLSFP<br/>FEGFKWERVMNFEDGGAVTVTQDTSLEDGLTIYKVKLRGTNFPDGPVPMQKKTMGWEASSERMPEDGVLKGDIKMALR</p>                                                                                                                                                                                                                                                                                                                                                                                                                                                                                                                                                                                                                                                                                                                                                                                                                                                         | p L e       | Y G 8   |

|                                                                      |                                                                                                                                                                                                                                                                                                                                                                                                                                                                                                                                                                                                                                                                                                                                                                                                                                                                                                                                                                                                                                             |                            |                  |
|----------------------------------------------------------------------|---------------------------------------------------------------------------------------------------------------------------------------------------------------------------------------------------------------------------------------------------------------------------------------------------------------------------------------------------------------------------------------------------------------------------------------------------------------------------------------------------------------------------------------------------------------------------------------------------------------------------------------------------------------------------------------------------------------------------------------------------------------------------------------------------------------------------------------------------------------------------------------------------------------------------------------------------------------------------------------------------------------------------------------------|----------------------------|------------------|
| let-<br>I.2a.E<br>R-<br>mTagBF<br>P2                                 | LKDGGRYLADFKTTYKAKKPVQMPGAYNVDRKLDITSHNEDYTVVEQYERSEGRHSTGGMDELYKASGSGATNFSLLKQAGDVEENPG <...> PMKLSLVAAMLLLSAARAVSKGEELIKENMHMKLYMEGTVDNHHFKCTSEGEKPYEGTQTRIKVVEGGPLFFAFDILATSFLYGSKTFINHTQGI PDDFKQSFPEGFTWERVTTYEDGGVLTATQDTSLDGCLLYNVKIRGVNFTSNGPVMQKKTGWAEFTETLYPADGGLEGRNDMALKLVGGSHLIANAKT TYRSKPKAKNLKMPGVVYVDYRLERIKEANNETYVEQHEVAVARYCDLPSKLGHLNKDEL                                                                                                                                                                                                                                                                                                                                                                                                                                                                                                                                                                                                                                                                              | n<br>t<br>i                |                  |
| ePKA-<br>KTR1.2<br>/mScar<br>let-<br>I/BCR.<br>2a.E-<br>mTagBF<br>P2 | MEMPEEPANSGHSLPVIYISPEYVSI CDSLVKVPKRASMVNEDEAPSKRRASLGVSRLERLTLQSSGAPVSKGEAVIKFEMRFKVMHEGSMNGHEFEIEGEGEGRPYEGTQAKLVTKGGPLPFSWDILSPQFMYGSAF IKHPADIPDYKQSFPEGFKWERVMNFDGGAVTVTQDTSLEDGTLIYKVKLRGTFNFPDGPVVMQKKTMGWEAS TERLYRLEKIDKMALRLKDGGRYLADFKTTYKAKKPVQMPGAYNVDRKLDITSHNEDYTVVEQYERSEGRHSTGGMDELYKSGSAGGSAGGSDIEQELEERAKASIRRLEQEVNQERSRMAYLQTL LAKGGSAGGSASGSGATNFSLLKQAGDVEENPG <...> PMKLSLVAAMLLLSAARAVSKGEELIKENMHMKLYMEGTVDNHHFKCTSEGEKPYEGTQTRIKVVEGGPLFFAFDILATSFLYGSKTFINHTQGI PDDFKQSFPEGFTWERVTTYEDGGVLTATQDTSLDGCLLYNVKIRGVNFTSNGPVMQKKTGWAEFTETLYPADGGLEGRNDMALKLVGGSHLIANAKT TYRSKPKAKNLKMPGVVYVDYRLERIKEANNETYVEQHEVAVARYCDLPSKLGHLNKDEL                                                                                                                                                                                                                                                                                                                                                                                | P<br>l<br>e<br>n<br>t<br>i | Y<br>G<br>1<br>8 |
| ERK-<br>KTR1/t<br>dCherry.<br>2a.H<br>2B-<br>mTagBF<br>P2            | MKGRKPRDLELPLSPSLLGGQGPERTPGSGTSSGLQAPGALSPSKRSGLEDPATPSKKPRTPSVSSRLERLTLQSSFQFPPSAPVSKGEEDNMAI I KEFMRFKVHMEGSMNGHEFEIEGEGEGRPYEGTQAKLVTKGGPLPFAWDILSPQFMYGSKAYVKHPADIPDYKLSFPEGFKWERVMNFDGGVTVTQDSSLQDGEFIYKVKLRGTFNFPDGPVVMQKKTMGWEASSE RMYPEDGALKGEIKQRLKLDGGHYDAEVKTTYKAKKPVQLPGAYNVNLIKLDITSHNEDYTVVEQYERAEGRHSTGGMD ELYKARGSAGSATM VSKGEEDNMAI I KEFMRFKVHMEGSMNGHEFEIEGEGEGRPYEGTQAKLVTKGGPLPFAWDILSPQFMYGSKAYVKHPADIPDYKLSFPEGFKWERVMNFDGGVTVTQDSSLQDGEFIYKVKLRGTFNFPDGPVVMQKKTMGWEASSE RMYPEDGALKGEIKQRLKLDGGHYDAEVKTTYKAKKPVQLPGAYNVNLIKLDITSHNEDYTVVEQYERAEGRHSTGGMDELYKASGSGATNFSLLKQAGDVEENPG <...> PSPAMPEPAKSAPAPKKGSKKAVTKAQKGGKRRRSRRESYSIYVYKVLKQVHPDGTGISSKAMGIMNSFVNDIFER IAGEASRLAHYNKRSTITSREIQTA VRLLLPGLLAKH AVSEGTKAITKYTS AKDPGGSSRVSKGEELIKENMHMKLYMEGTVDNHHFKCTSEGEKPYEGTQTRIKVVEGGPLFFAFDILATSFLYGSKTFINHTQGI PDDFKQSFPEGFTWERVTTYEDGGVLTATQDTSLDGCLLYNVKIRGVNFTSNGPVMQKKTGWAEFTETLYPADGGLEGRNDMALKLVGGSHLIANAKT TYRSKPKAKNLKMPGVVYVDYRLERIKEANNETYVEQHEVAVARYCDLPSKLGHLNGMDELYKGRSPGLNGGSGATNFSLLKQAGDVEENPG | P<br>C                     | S<br>4<br>6<br>8 |
| eERK-<br>KTR1.1<br>/tdCher<br>rry.2a<br>.H2B-<br>mTagBF<br>P2        | MKGRKPRDLELPLSPSLLGGQGPERTPGSGTSSGLQAPGALSPSKRSGLEDPATPSKKPRTPSVSSRLERLTLQSSFQFPPSAPVSKGEEDNMAI I KEFMRFKVHMEGSMNGHEFEIEGEGEGRPYEGTQAKLVTKGGPLPFAWDILSPQFMYGSKAYVKHPADIPDYKLSFPEGFKWERVMNFDGGVTVTQDSSLQDGEFIYKVKLRGTFNFPDGPVVMQKKTMGWEASSE RMYPEDGALKGEIKQRLKLDGGHYDAEVKTTYKAKKPVQLPGAYNVNLIKLDITSHNEDYTVVEQYERAEGRHSTGGMD ELYKARGSAGSATM VSKGEEDNMAI I KEFMRFKVHMEGSMNGHEFEIEGEGEGRPYEGTQAKLVTKGGPLPFAWDILSPQFMYGSKAYVKHPADIPDYKLSFPEGFKWERVMNFDGGVTVTQDSSLQDGEFIYKVKLRGTFNFPDGPVVMQKKTMGWEASSE RMYPEDGALKGEIKQRLKLDGGHYDAEVKTTYKAKKPVQLPGAYNVNLIKLDITSHNEDYTVVEQYERAEGRHSTGGMDELYKASGSGATNFSLLKQAGDVEENPG <...> PSPAMPEPAKSAPAPKKGSKKAVTKAQKGGKRRRSRRESYSIYVYKVLKQVHPDGTGISSKAMGIMNSFVNDIFER IAGEASRLAHYNKRSTITSREIQTA VRLLLPGLLAKH AVSEGTKAITKYTS AKDPGGSSRVSKGEELIKENMHMKLYMEGTVDNHHFKCTSEGEKPYEGTQTRIKVVEGGPLFFAFDILATSFLYGSKTFINHTQGI PDDFKQSFPEGFTWERVTTYEDGGVLTATQDTSLDGCLLYNVKIRGVNFTSNGPVMQKKTGWAEFTETLYPADGGLEGRNDMALKLVGGSHLIANAKT TYRSKPKAKNLKMPGVVYVDYRLERIKEANNETYVEQHEVAVARYCDLPSKLGHLNGMDELYKGRSPGLNGGSGATNFSLLKQAGDVEENPG | P<br>C                     | S<br>7<br>1<br>2 |
| eERK-<br>KTR1.2<br>/tdCher<br>rry.2a<br>.H2B-<br>mTagBF<br>P2        | MKGRKPRDLELPLSPSLLGGQGPERTPGSGTSSGLQAPGALSPSKRSGLEDPATPSKKPRTPSVSSRLERLTLQSSFQFPPSAPVSKGEEDNMAI I KEFMRFKVHMEGSMNGHEFEIEGEGEGRPYEGTQAKLVTKGGPLPFAWDILSPQFMYGSKAYVKHPADIPDYKLSFPEGFKWERVMNFDGGVTVTQDSSLQDGEFIYKVKLRGTFNFPDGPVVMQKKTMGWEASSE RMYPEDGALKGEIKQRLKLDGGHYDAEVKTTYKAKKPVQLPGAYNVNLIKLDITSHNEDYTVVEQYERAEGRHSTGGMD ELYKARGSAGSATM VSKGEEDNMAI I KEFMRFKVHMEGSMNGHEFEIEGEGEGRPYEGTQAKLVTKGGPLPFAWDILSPQFMYGSKAYVKHPADIPDYKLSFPEGFKWERVMNFDGGVTVTQDSSLQDGEFIYKVKLRGTFNFPDGPVVMQKKTMGWEASSE RMYPEDGALKGEIKQRLKLDGGHYDAEVKTTYKAKKPVQLPGAYNVNLIKLDITSHNEDYTVVEQYERAEGRHSTGGMDELYKASGSGATNFSLLKQAGDVEENPG <...> PSPAMPEPAKSAPAPKKGSKKAVTKAQKGGKRRRSRRESYSIYVYKVLKQVHPDGTGISSKAMGIMNSFVNDIFER IAGEASRLAHYNKRSTITSREIQTA VRLLLPGLLAKH AVSEGTKAITKYTS AKDPGGSSRVSKGEELIKENMHMKLYMEGTVDNHHFKCTSEGEKPYEGTQTRIKVVEGGPLFFAFDILATSFLYGSKTFINHTQGI PDDFKQSFPEGFTWERVTTYEDGGVLTATQDTSLDGCLLYNVKIRGVNFTSNGPVMQKKTGWAEFTETLYPADGGLEGRNDMALKLVGGSHLIANAKT TYRSKPKAKNLKMPGVVYVDYRLERIKEANNETYVEQHEVAVARYCDLPSKLGHLNGMDELYKGRSPGLNGGSGATNFSLLKQAGDVEENPG | P<br>C                     | S<br>7<br>1<br>3 |
| eERK-<br>KTR1.3<br>/tdCher<br>rry.2a<br>.H2B-<br>mTagBF<br>P2        | MKGRKPRDLELPLSPSLLGGQGPERTPGSGTSSGLQAPGALSPSKRSGLEDPATPSKKPRTPSVSSRLERLTLQSSFQFPPSAPVSKGEEDNMAI I KEFMRFKVHMEGSMNGHEFEIEGEGEGRPYEGTQAKLVTKGGPLPFAWDILSPQFMYGSKAYVKHPADIPDYKLSFPEGFKWERVMNFDGGVTVTQDSSLQDGEFIYKVKLRGTFNFPDGPVVMQKKTMGWEASSE RMYPEDGALKGEIKQRLKLDGGHYDAEVKTTYKAKKPVQLPGAYNVNLIKLDITSHNEDYTVVEQYERAEGRHSTGGMD ELYKARGSAGSATM VSKGEEDNMAI I KEFMRFKVHMEGSMNGHEFEIEGEGEGRPYEGTQAKLVTKGGPLPFAWDILSPQFMYGSKAYVKHPADIPDYKLSFPEGFKWERVMNFDGGVTVTQDSSLQDGEFIYKVKLRGTFNFPDGPVVMQKKTMGWEASSE RMYPEDGALKGEIKQRLKLDGGHYDAEVKTTYKAKKPVQLPGAYNVNLIKLDITSHNEDYTVVEQYERAEGRHSTGGMDELYKASGSGATNFSLLKQAGDVEENPG <...> PSPAMPEPAKSAPAPKKGSKKAVTKAQKGGKRRRSRRESYSIYVYKVLKQVHPDGTGISSKAMGIMNSFVNDIFER IAGEASRLAHYNKRSTITSREIQTA VRLLLPGLLAKH AVSEGTKAITKYTS AKDPGGSSRVSKGEELIKENMHMKLYMEGTVDNHHFKCTSEGEKPYEGTQTRIKVVEGGPLFFAFDILATSFLYGSKTFINHTQGI PDDFKQSFPEGFTWERVTTYEDGGVLTATQDTSLDGCLLYNVKIRGVNFTSNGPVMQKKTGWAEFTETLYPADGGLEGRNDMALKLVGGSHLIANAKT TYRSKPKAKNLKMPGVVYVDYRLERIKEANNETYVEQHEVAVARYCDLPSKLGHLNGMDELYKGRSPGLNGGSGATNFSLLKQAGDVEENPG | P<br>C                     | S<br>7<br>6<br>5 |
| eERK-<br>KTR1.2<br>/mScar<br>let-<br>I.2a.E                          | MKGRKPRDLELPLSPSLLGGQGPERTPGSGTSSGLQAPGALSPSKRSGLEDPATPSKKPRTPSVSSRLERLTLQSSFQFPPSAPVSKGEAVIKFEMRFKVMHEGSMNGHEFEIEGEGEGRPYEGTQAKLVTKGGPLPFSWDILSPQFMYGSAF IKHPADIPDYKQSFPEGFKWERVMNFDGGAVTVTQDTSLEDGTLIYKVKLRGTFNFPDGPVVMQKKTMGWEAS TERLYRLEKIDKMALRLKDGGRYLADFKTTYKAKKPVQMPGAYNVDRKLDITSHNEDYTVVEQYERSEGRHSTGGMDELYKASGSGATNFSLLKQAGDVEENPG <...> PMKLSLVAAMLLLSAARAVSKGEELIKENMHMKLYMEGTVDNHHFKCTSEGEKPYEGTQTRIKVVEGGPLFFAFDILATSFLYGSKTFINHTQGI PDDFKQSFPEGFTWERVTTYEDGGVLTATQDTSLDGCLLYNVKIRGVNFTSNGPVMQKKTGWAEFTETLYPADGGLEGRNDMALKLVGGSHLIANAKT TYRSKPKAKNLKMPGVVYVDYRLERIKEANNETYVEQHEVAVARYCDLPSKLGHLNKDEL                                                                                                                                                                                                                                                                                                                                                                                                                          | P<br>l<br>e<br>n           | S<br>9<br>4<br>0 |



|                                                                        |                                                                                                                                                                                                                                                                                                                                                                                                                                                                                                                                                                                                                                                                                                                                                                                                                                                                                                                                                                                                                                                                                                                                                                                                                                                                                          |                            |                       |
|------------------------------------------------------------------------|------------------------------------------------------------------------------------------------------------------------------------------------------------------------------------------------------------------------------------------------------------------------------------------------------------------------------------------------------------------------------------------------------------------------------------------------------------------------------------------------------------------------------------------------------------------------------------------------------------------------------------------------------------------------------------------------------------------------------------------------------------------------------------------------------------------------------------------------------------------------------------------------------------------------------------------------------------------------------------------------------------------------------------------------------------------------------------------------------------------------------------------------------------------------------------------------------------------------------------------------------------------------------------------|----------------------------|-----------------------|
| R-<br>mTagBF<br>P2                                                     | KCTSEGEKPYEGTQTMRIKVVVEGGPLPFAFDILATSFLYGSKTFINHTQGI P D F F K Q S F P E G F T W E R V T T Y E D G G V L T A T Q D T S L Q D G C L I Y N V K I R G V N F T S N G P V M Q K K T L G W E A F T E T L Y P A D G G L E G R N D M A L K L V G G S H L I A N A K T T Y R S K K P A K N L K M P G V Y Y V D Y R L E R I K E A N N E T Y V E Q H E V A V A R Y C D L P S K L G H K L N K D E L                                                                                                                                                                                                                                                                                                                                                                                                                                                                                                                                                                                                                                                                                                                                                                                                                                                                                                   | t<br>i                     |                       |
| eERK-<br>KTR1.2<br>/mScar<br>let-<br>I/BCR.<br>2a. ER-<br>mTagBF<br>P2 | <b>MKGRKPRDLEPLSPSLLGGQPPERTPGSGTSSGLQAPGPALSPSKRSGLLEDDEPATPSKPKRTPPSVSSRLERLTLQSS</b><br>FQFPGSAPVSKGEAVIKEFMRFKVHMEGSMNGHEFEIEEGEGRPEYEGTQAKLKVTKGGPLPFSWDILSPQFMYGSRA<br>FIKHPADIPDYKQSFPEGFKWERVMNFEDGGAVTVDQTSLEDGTLIYKVKLRGTNFPDPGPMQKKTMGWEAS<br>TERLYPEDGVLKGDIKMALRLKDGGRYLADFKTTYKAKKPVQMPGAYNVDRKLDITSHNEDYTVVEQYERSEGRHSTGGMDEL<br>YKSGSAGGSAGSDIEQELERAKASIRRLQEVNQERSRMAYLQTLTLLAKGGSAGGSASGSGATNFSLLKQAGDVEENP<br>G <...> PMKLSLVAAMLLLLSAARAVSKGEELIKENMHMKLYMEGTVDNHHFKCTSEGEKPYEGTQTMRIKVVVEG<br>GPLPFAFDILATSFLYGSKTFINHTQGI P D F F K Q S F P E G F T W E R V T T Y E D G G V L T A T Q D T S L Q D G C L I Y N V K I R G V N F T S N G P V M Q K K T L G W E A F T E T L Y P A D G G L E G R N D M A L K L V G G S H L I A N A K T T Y R S K K P A K N L K M P G V Y Y V D Y R L E R I K E A N N E T Y V E Q H E V A V A R Y C D L P S K L G H K L N K D E L                                                                                                                                                                                                                                                                                                                                                                                                       | P<br>l<br>e<br>n<br>t<br>i | Y<br>G<br>2<br>1      |
| ePKA-<br>KTR1.2<br>/tdChe<br>rry.2a<br>.3xNLS<br>-<br>mTagBF<br>P2     | <b>MEMPEEPANSGHSLPPVYIYSPEYVSI C D S L V K V P K R A S M V N E D E A P S K R R A S L G V S S R L E R L T L Q S S G A P V S K G E E D N</b><br>MAIKEFMRFKVHMEGSMNGHEFEIEEGEGRPEYEGTQAKLKVTKGGPLPFAWDILSPQFMYGSKAYVKHPADIPDY<br>KLSFPFGFKWERVMNFEDGGVVTVDQSSLDQGEFIYKVKLRGTNFPDGPVMQKKTMGWEASSERMPEDGALKGEIK<br>QRLKLDGGHYDAEVKTTYKAKKPVQLPGAYNVNIKLDITSHNEDYTIIVEQYERAEGRHSTGGMDELYKARGSAGSATT<br>MVSKGEEDNMAIKEFMRFKVHMEGSMNGHEFEIEEGEGRPEYEGTQAKLKVTKGGPLPFAWDILSPQFMYGSKAYVK<br>HPADIPDYKLSFPFGFKWERVMNFEDGGVVTVDQSSLDQGEFIYKVKLRGTNFPDGPVMQKKTMGWEASSERMP<br>DALKGEIKQRLKLDGGHYDAEVKTTYKAKKPVQLPGAYNVNIKLDITSHNEDYTIIVEQYERAEGRHSTGGMDELYK<br>SGSGATNFSLLKQAGDVEENPG <...> PSPAPKKRKRKVGDDGCPKKRKRKVGDDGCPKKRKRKVGDDGCPKKRKRKVGDDSSRVSKGEE<br>LKENMHMKLYMEGTVDNHHFKCTSEGEKPYEGTQTMRIKVVVEGGPLPFAFDILATSFLYGSKTFINHTQGI P D F F K Q S F P E G F T W E R V T T Y E D G G V L T A T Q D T S L Q D G C L I Y N V K I R G V N F T S N G P V M Q K K T L G W E A F T E T L Y P A D G G L E G R N D M A L K L V G G S H L I A N A K T T Y R S K K P A K N L K M P G V Y Y V D Y R L E R I K E A N N E T Y V E Q H E V A V A R Y C D L P S K L G H K L N G M D E L Y K G R S P G L N G S G A T N F S L L K Q A G D V E E N P G                                                                | P<br>C                     | S<br>3<br>8<br>1      |
| ePKA-<br>KTR1.2<br>/tdChe<br>rry.2a<br>.ER-<br>mTagBF<br>P2            | <b>MEMPEEPANSGHSLPPVYIYSPEYVSI C D S L V K V P K R A S M V N E D E A P S K R R A S L G V S S R L E R L T L Q S S G A P V S K G E E D N</b><br>MAIKEFMRFKVHMEGSMNGHEFEIEEGEGRPEYEGTQAKLKVTKGGPLPFAWDILSPQFMYGSKAYVKHPADIPDY<br>KLSFPFGFKWERVMNFEDGGVVTVDQSSLDQGEFIYKVKLRGTNFPDGPVMQKKTMGWEASSERMPEDGALKGEIK<br>QRLKLDGGHYDAEVKTTYKAKKPVQLPGAYNVNIKLDITSHNEDYTIIVEQYERAEGRHSTGGMDELYKARGSAGSATT<br>MVSKGEEDNMAIKEFMRFKVHMEGSMNGHEFEIEEGEGRPEYEGTQAKLKVTKGGPLPFAWDILSPQFMYGSKAYVK<br>HPADIPDYKLSFPFGFKWERVMNFEDGGVVTVDQSSLDQGEFIYKVKLRGTNFPDGPVMQKKTMGWEASSERMP<br>DALKGEIKQRLKLDGGHYDAEVKTTYKAKKPVQLPGAYNVNIKLDITSHNEDYTIIVEQYERAEGRHSTGGMDELYK<br>SGSGATNFSLLKQAGDVEENPG <...> PMKLSLVAAMLLLLSAARAVSKGEELIKENMHMKLYMEGTVDNHHFKCT<br>SEGEKPYEGTQTMRIKVVVEGGPLPFAFDILATSFLYGSKTFINHTQGI P D F F K Q S F P E G F T W E R V T T Y E D G G V L T A T Q D T S L Q D G C L I Y N V K I R G V N F T S N G P V M Q K K T L G W E A F T E T L Y P A D G G L E G R N D M A L K L V G G S H L I A N A K T T Y R S K K P A K N L K M P G V Y Y V D Y R L E R I K E A N N E T Y V E Q H E V A V A R Y C D L P S K L G H K L N K D E L                                                                                                                                                                   | P<br>l<br>e<br>n<br>t<br>i | Y<br>G<br>6<br>3      |
| ePKA-<br>KTR1.2<br>/tdTom<br>ato.2a<br>.ER-<br>mTagBF<br>P2            | <b>MEMPEEPANSGHSLPPVYIYSPEYVSI C D S L V K V P K R A S M V N E D E A P S K R R A S L G V S S R L E R L T L Q S S G A P V S K G E E V I</b><br>KEFMRFKVHMEGSMNGHEFEIEEGEGRPEYEGTQAKLKVTKGGPLPFAWDILSPQFMYGSKAYVKHPADIPDYKLS<br>FPEGFKWERVMNFEDGGLVTVTQDSSLQDGTLYIYKVKMRGTNFPDGPVMQKKTMGWEASTERLYPRDGLKGEIHQAL<br>LKDGGHYLVFVKTIYMAKKPVQLPGYVVDTKLDITSHNEDYTIIVEQYERSEGRHHLFLGHGTGSGSGTASSEDN<br>NMAVIKEFMRFKVHMEGSMNGHEFEIEEGEGRPEYEGTQAKLKVTKGGPLPFAWDILSPQFMYGSKAYVKHPADIP<br>DYKLSFPFGFKWERVMNFEDGGLVTVTQDSSLHDTLYIYKVKMRGTNFPDGPVMQKKTMGWEASTERLYPRDGLK<br>GEIHQALKLDGGHYLVFVKTIYMAKKPVQLPGYVVDTKLDITSHNEDYTIIVEQYERSEGRHHLFLYGMDELYKASG<br>SGATNFSLLKQAGDVEENPG <...> PMKLSLVAAMLLLLSAARAVSKGEELIKENMHMKLYMEGTVDNHHFKCT<br>SEGEKPYEGTQTMRIKVVVEGGPLPFAFDILATSFLYGSKTFINHTQGI P D F F K Q S F P E G F T W E R V T T Y E D G G V L T A T Q D T S L Q D G C L I Y N V K I R G V N F T S N G P V M Q K K T L G W E A F T E T L Y P A D G G L E G R N D M A L K L V G G S H L I A N A K T T Y R S K K P A K N L K M P G V Y Y V D Y R L E R I K E A N N E T Y V E Q H E V A V A R Y C D L P S K L G H K L N K D E L                                                                                                                                                                       | P<br>l<br>e<br>n<br>t<br>i | Y<br>G<br>5<br>0      |
| eERK-<br>KTR1.2<br>/emiRF<br>P670.2<br>a.ER-<br>mTagBF<br>P2           | <b>MKGRKPRDLEPLSPSLLGGQPPERTPGSGTSSGLQAPGPALSPSKRSGLLEDDEPATPSKPKRTPPSVSSRLERLTLQSS</b><br>FQFPGSAPMAEGSVARQPDLLTCEHEEIHLAGSIQPHGALLVVEHSHRVIQASANAEEFLNLGSLVGLPAIEIDGDL<br>L I K I L P H L D P T A E G M P V A V R C R I G N P S T E Y C G L M H R P E G G L I E L E R A G P S I D L S G T L A P A L E R I N T A G S L R A L C D D T V<br>L L F Q Q C T G Y D R V M V Y R F D E Q G H L V F S E C H V P G L E S Y F G N R Y P S S T V P Q M A R Q L Y V R Q R V R V L V D V T Y Q V P L E P R L S P<br>L T G R D L D M S G C F L R S M S P C H L Q F L K D M G V R A T L A V S L V V G G K L W L G V V C H H Y L P R F I R F E L R A I C K R L A E R I A T R I T A L<br>E S L Y K A S G S G A T N F S L L K Q A G D V E E N P G   < . . . >   P M K L S L V A A M L L L L S A A R A V S K G E E L I K E N M H M K L Y M E G T V D N H H F K C T S E G E K<br>P Y E G T Q T M R I K V V E G G P L P F A F D I L A T S F L Y G S K T F I N H T Q G I P D F F K Q S F P E G F T W E R V T T Y E D G G V L T A T Q D T S L Q<br>D G C L I Y N V K I R G V N F T S N G P V M Q K K T L G W E A F T E T L Y P A D G G L E G R N D M A L K L V G G S H L I A N A K T T Y R S K K P A K N L K M P G V Y Y V D Y R L E R I K E A N N E T Y V E Q H E V A V A R Y C D L P S K L G H K L N K D E L | P<br>l<br>e<br>n<br>t<br>i | Y<br>G<br>6           |
| ePKA-<br>KTR1.4<br>/tdTom<br>ato.2a<br>.ER-<br>mTagBF<br>P2            | <b>MEMPEEPANSGHSLPPVYIYSPEYVSI C D S L V K V P K R A S M V N E D E A P A K R R A S L G V S S R L E R L T L Q S S G A P V S K G E E V I</b><br>IKEFMRFKVHMEGSMNGHEFEIEEGEGRPEYEGTQAKLKVTKGGPLPFAWDILSPQFMYGSKAYVKHPADIPDYKLS<br>FPEGFKWERVMNFEDGGLVTVTQDSSLQDGTLYIYKVKMRGTNFPDGPVMQKKTMGWEASTERLYPRDGLKGEIHQAL<br>KLKDGGHYLVFVKTIYMAKKPVQLPGYVVDTKLDITSHNEDYTIIVEQYERSEGRHHLFLGHGTGSGSGTASSED<br>NNMAVIKEFMRFKVHMEGSMNGHEFEIEEGEGRPEYEGTQAKLKVTKGGPLPFAWDILSPQFMYGSKAYVKHPADIP<br>DYKLSFPFGFKWERVMNFEDGGLVTVTQDSSLHDTLYIYKVKMRGTNFPDGPVMQKKTMGWEASTERLYPRDGLK<br>GEIHQALKLDGGHYLVFVKTIYMAKKPVQLPGYVVDTKLDITSHNEDYTIIVEQYERSEGRHHLFLYGMDELYKASG<br>SGATNFSLLKQAGDVEENPG <...> PMKLSLVAAMLLLLSAARAVSKGEELIKENMHMKLYMEGTVDNHHFKCTSEGE<br>KPYEGTQTMRIKVVVEGGPLPFAFDILATSFLYGSKTFINHTQGI P D F F K Q S F P E G F T W E R V T T Y E D G G V L T A T Q D T S L Q<br>D G C L I Y N V K I R G V N F T S N G P V M Q K K T L G W E A F T E T L Y P A D G G L E G R N D M A L K L V G G S H L I A N A K T T Y R S K K P A K N L K M P G V Y Y V D Y R L E R I K E A N N E T Y V E Q H E V A V A R Y C D L P S K L G H K L N K D E L                                                                                                                                                                  | P<br>l<br>e<br>n<br>t<br>i | Y<br>G<br>1<br>1<br>5 |
| PKA-<br>KTR2/m<br>Cherry<br>.2a.H2<br>B-                               | <b>MVLRASLGKRRASLGKRRASLGVDQLRLERLQIDE</b> GAPVSKGEEDNMAIKEFMRFKVHMEGSMNGHEFEIEEGEGR<br>PEYEGTQAKLKVTKGGPLPFAWDILSPQFMYGSKAYVKHPADIPDYKLSFPFGFKWERVMNFEDGGVVTVDQSSLDQ<br>GEFIYKVKLRGTNFPDGPVMQKKTMGWEASSERMPEDGALKGEIKQRLKLDGGHYDAEVKTTYKAKKPVQLPGAY<br>NVNIKLDITSHNEDYTIIVEQYERAEGRHSTGGMDELYKASGATNFSLLKQAGDVEENPG <...> PSPAMPEAKS<br>GAPAPKKGSKAVTKAQKGGKRRKRKRKESYSIYVYKVLQVHPDGTGISSKAMGIMNSFVNDIFERIAGEASRLAHYK                                                                                                                                                                                                                                                                                                                                                                                                                                                                                                                                                                                                                                                                                                                                                                                                                                                                   | P<br>C                     | S<br>7<br>3<br>7      |

|                                                     |                                                                                                                                                                                                                                                                                                                                                                                                                                                                                                                                                                                                                                                                                                                                                                                                                                                                                                                                                                                                                                                                                                                                                                                                                                                                                                                                                                                                                                                                                                                                                                                                                                                                                                                                                                                                                                                                                                                                                                                                      |                           |                       |
|-----------------------------------------------------|------------------------------------------------------------------------------------------------------------------------------------------------------------------------------------------------------------------------------------------------------------------------------------------------------------------------------------------------------------------------------------------------------------------------------------------------------------------------------------------------------------------------------------------------------------------------------------------------------------------------------------------------------------------------------------------------------------------------------------------------------------------------------------------------------------------------------------------------------------------------------------------------------------------------------------------------------------------------------------------------------------------------------------------------------------------------------------------------------------------------------------------------------------------------------------------------------------------------------------------------------------------------------------------------------------------------------------------------------------------------------------------------------------------------------------------------------------------------------------------------------------------------------------------------------------------------------------------------------------------------------------------------------------------------------------------------------------------------------------------------------------------------------------------------------------------------------------------------------------------------------------------------------------------------------------------------------------------------------------------------------|---------------------------|-----------------------|
| <p><b>mTagBF P2</b></p>                             | <p>RSTITSREIQTAVRLLLPGLAKHAVSEGTKAITKYTSAKDPGGSSRVSKGEELIKENMHMKLYMEGTVDNHHFKCTS<br/>EGEGKPYEGTQTMRIKVVVEGGPLPFAFDILATSFLYGSKTFINHTQGI P D F F K Q S F P E G F T W E R V T T Y E D G G V L T A T Q D<br/>T S L Q D G C L I Y N V K I R G V N F T S N G P V M Q K K T L G W E A F T E T L Y P A D G G L E G R N D M A L K L V G G S H L I A N A K T T Y R S K K P A K N<br/>L K M P G V Y Y V D Y R L E R I K E A N N E T Y V E Q H E V A V A R Y C D L P S K L G H K L N G M D E L Y K G R S P G L N G G S G A T N F S L L K Q A G D V E<br/>E N P G</p>                                                                                                                                                                                                                                                                                                                                                                                                                                                                                                                                                                                                                                                                                                                                                                                                                                                                                                                                                                                                                                                                                                                                                                                                                                                                                                                                                                                                                                             |                           |                       |
| <p><b>PKA-KTR2/t dCherry.2a.H 2B-mTagBF P2</b></p>  | <p><b>MVLRASLGRASLGRASLGVQDLRLRLQIDEGAPVSKGEEDNMAI</b> I K E F M R F K V H M E G S V N G H E F E I E G E G E G R<br/>P Y E G T Q T A K L K V T K G G P L P F A W D I L S P Q F M Y G S K A Y V K H P A D I P D Y L K L S F P E G F K W E R V M N F E D G G V V T V T Q D S S L Q D<br/>G E F I Y K V K L R G T N F P S D G P V M Q K K T M G W E A S S E R M Y P E D G A L K G E I K Q R L K L K D G G H Y D A E V K T T Y K A K K P V Q L P G A Y N<br/>V N I K L D I T S H N E D Y T I V E Q Y E R A E G R H S T G G M D E L Y K A R G S A G S A T T M V S K G E E D N M A I I K E F M R F K V H M E G S V N G H E F<br/>E I E G E G E G R P Y E G T Q T A K L K V T K G G P L P F A W D I L S P Q F M Y G S K A Y V K H P A D I P D Y L K L S F P E G F K W E R V M N F E D G G V V T<br/>V T Q D S S L Q D G E F I Y K V K L R G T N F P S D G P V M Q K K T M G W E A S S E R M Y P E D G A L K G E I K Q R L K L K D G G H Y D A E V K T T Y K A K K<br/>P V Q L P G A Y N V N I K L D I T S H N E D Y T I V E Q Y E R A E G R H S T G G M D E L Y K A S G S G A T N F S L L K Q A G D V E E N P G   &lt; . . . &gt;   P S<br/>P A M P E P A K S A P A P K K G S K K A V T K A Q K K G G K R K R S R K E S Y S I Y V Y K V L K Q V H P D T G I S S K A M G I M N S F V N D I F E R I A G E<br/>A S R L A H Y N K R S T I T S R E I Q T A V R L L P G L A K H A V S E G T K A I T K Y T S A K D P G G S S R V S K G E E L I K E N M H M K L Y M E G T V<br/>D N H H F K C T S E G E G K P Y E G T Q T M R I K V V E G G P L P F A F D I L A T S F L Y G S K T F I N H T Q G I P D F F K Q S F P E G F T W E R V T T Y E D<br/>G G V L T A T Q D T S L Q D G C L I Y N V K I R G V N F T S N G P V M Q K K T L G W E A F T E T L Y P A D G G L E G R N D M A L K L V G G S H L I A N A K T T Y R S K K P A K N L K M P G V Y Y<br/>V D Y R L E R I K E A N N E T Y V E Q H E V A V A R Y C D L P S K L G H K L N G M D E L Y K G R S P G L N G G S G A T N F S<br/>L L K Q A G D V E E N P G</p> | <p><b>P C</b></p>         | <p><b>S 7 3 8</b></p> |
| <p><b>PKA-KTR3/m Cherry.2a.ER -mTagBF P2</b></p>    | <p><b>MEMPEEPANSGHSLPPVYIYSPEYSIFDSLKVKRNPTVVNEDEAPSKRKRSLPISSRLRLTLQSSGAPVSKGEEDNM</b><br/>A I I K E F M R F K V H M E G S V N G H E F E I E G E G E G R P Y E G T Q T A K L K V T K G G P L P F A W D I L S P Q F M Y G S K A Y V K H P A D I P D Y L K<br/>L S F P E G F K W E R V M N F E D G G V V T V T Q D S S L Q D G E F I Y K V K L R G T N F P S D G P V M Q K K T M G W E A S S E R M Y P E D G A L K G E I K Q<br/>R L K L K D G G H Y D A E V K T T Y K A K K P V Q L P G A Y N V N I K L D I T S H N E D Y T I V E Q Y E R A E G R H S T G G M D E L Y K A S G S G A T N F S L<br/>L K Q A G D V E E N P G   &lt; . . . &gt;   P M K L S L V A A M L L L S A A R A V S K G E E L I K E N M H M K L Y M E G T V D N H H F K C T S E G E G K P Y E G<br/>T Q T M R I K V V E G G P L P F A F D I L A T S F L Y G S K T F I N H T Q G I P D F F K Q S F P E G F T W E R V T T Y E D G G V L T A T Q D T S L Q D G C L I<br/>Y N V K I R G V N F T S N G P V M Q K K T L G W E A F T E T L Y P A D G G L E G R N D M A L K L V G G S H L I A N A K T T Y R S K K P A K N L K M P G V Y Y<br/>V D Y R L E R I K E A N N E T Y V E Q H E V A V A R Y C D L P S K L G H K L N K D E L</p>                                                                                                                                                                                                                                                                                                                                                                                                                                                                                                                                                                                                                                                                                                                                                                                                    | <p><b>P L e n t i</b></p> | <p><b>Y G 6 9</b></p> |
| <p><b>PKA-KTR3/t dCherry.2a.ER -mTagBF P2</b></p>   | <p><b>MEMPEEPANSGHSLPPVYIYSPEYSIFDSLKVKRNPTVVNEDEAPSKRKRSLPISSRLRLTLQSSGAPVSKGEEDNM</b><br/>A I I K E F M R F K V H M E G S V N G H E F E I E G E G E G R P Y E G T Q T A K L K V T K G G P L P F A W D I L S P Q F M Y G S K A Y V K H P A D I P D Y L K<br/>L S F P E G F K W E R V M N F E D G G V V T V T Q D S S L Q D G E F I Y K V K L R G T N F P S D G P V M Q K K T M G W E A S S E R M Y P E D G A L K G E I K Q<br/>R L K L K D G G H Y D A E V K T T Y K A K K P V Q L P G A Y N V N I K L D I T S H N E D Y T I V E Q Y E R A E G R H S T G G M D E L Y K A R G S A G S A T T M<br/>V S K G E E D N M A I I K E F M R F K V H M E G S V N G H E F E I E G E G E G R P Y E G T Q T A K L K V T K G G P L P F A W D I L S P Q F M Y G S K A Y V K H<br/>P A D I P D Y L K L S F P E G F K W E R V M N F E D G G V V T V T Q D S S L Q D G E F I Y K V K L R G T N F P S D G P V M Q K K T M G W E A S S E R M Y P E D<br/>G A L K G E I K Q R L K L K D G G H Y D A E V K T T Y K A K K P V Q L P G A Y N V N I K L D I T S H N E D Y T I V E Q Y E R A E G R H S T G G M D E L Y K A S<br/>G S G A T N F S L L K Q A G D V E E N P G   &lt; . . . &gt;   P M K L S L V A A M L L L S A A R A V S K G E E L I K E N M H M K L Y M E G T V D N H H F K C T S<br/>E G E G K P Y E G T Q T M R I K V V E G G P L P F A F D I L A T S F L Y G S K T F I N H T Q G I P D F F K Q S F P E G F T W E R V T T Y E D G G V L T A T Q D<br/>T S L Q D G C L I Y N V K I R G V N F T S N G P V M Q K K T L G W E A F T E T L Y P A D G G L E G R N D M A L K L V G G S H L I A N A K T T Y R S K K P A K N<br/>L K M P G V Y Y V D Y R L E R I K E A N N E T Y V E Q H E V A V A R Y C D L P S K L G H K L N K D E L</p>                                                                                                                                                                                                                                                                            | <p><b>P L e n t i</b></p> | <p><b>Y G 7 1</b></p> |
| <p><b>ERK-KTR1/e miRFP6 70.2a.ER -mTagBF P2</b></p> | <p><b>MKGRKPRDLELPLSPSLGGQGPERTPGSGTSSGLQAPGALSPSKRSGLEDPATPSKPRTPSVSSRLRLTLQSSFQ</b><br/>F P S G A P M A E G S V A R Q P D L L T C E H E E I H L A G S I Q P H G A L L V V S E H D H R V I Q A S A N A E F L N L G S V L G V P L A E I D G D L L I K<br/>I L P H L D P T A E G M P V A V R C R I G N P S T E Y C G L M H R P P E G G L I E I E L E R A G P S I D L S G T L A P A L E R I R T A G S L R A L C D D T V L L<br/>F Q Q C T G Y D R V M V Y R F D E Q G H G L V F S E C H V P G L E S Y F G N R Y P S T V P Q M A R Q L Y V R Q R V R V L V D V T Y Q P V P L E P R L S P L T<br/>G R D L D M S G C F L R S M S P C H L Q F L K D M G V R A T L A V S L V V G G K L W L V V C H H Y L P R F I R F E L R A I C K R L A E R I A T R I T A L E S<br/>L Y K A S G S G A T N F S L L K Q A G D V E E N P G   &lt; . . . &gt;   P M K L S L V A A M L L L S A A R A V S K G E E L I K E N M H M K L Y M E G T V D N H H<br/>F K C T S E G E G K P Y E G T Q T M R I K V V E G G P L P F A F D I L A T S F L Y G S K T F I N H T Q G I P D F F K Q S F P E G F T W E R V T T Y E D G G V L<br/>T A T Q D T S L Q D G C L I Y N V K I R G V N F T S N G P V M Q K K T L G W E A F T E T L Y P A D G G L E G R N D M A L K L V G G S H L I A N A K T T Y R S K<br/>K P A K N L K M P G V Y Y V D Y R L E R I K E A N N E T Y V E Q H E V A V A R Y C D L P S K L G H K L N K D E L</p>                                                                                                                                                                                                                                                                                                                                                                                                                                                                                                                                                                                                            | <p><b>P L e n t i</b></p> | <p><b>Y G 4 5</b></p> |

*Table S2. List of plasmid numbers and the ORF they express.*

| <b>Name</b> | <b>Description (ORF expressed)</b>                  | <b>vector backbone</b>     | <b>promoter</b> |
|-------------|-----------------------------------------------------|----------------------------|-----------------|
| S739        | PKA-KTR1-mCherry 2a H2B-mTagBFP2                    | pC (plasmid)               | CMV             |
| S777        | mCherry-PKA-KTR2 2a H2B-mTagBFP2                    | pC (plasmid)               | CMV             |
| S740        | PKA-KTR1-tdCherry 2a H2B-mTagBFP2                   | pC (plasmid)               | CMV             |
| S738        | PKA-KTR2-tdCherry 2a H2B-mTagBFP2                   | pC (plasmid)               | CMV             |
| S741        | ePKA-KTR1.1-tdCherry 2a H2B-mTagBFP2                | pC (plasmid)               | CMV             |
| S467        | ePKA-KTR1.2-tdCherry 2a H2B-mTagBFP2                | pC (plasmid)               | CMV             |
| S514        | ePKA-KTR1.3-tdCherry 2a H2B-mTagBFP2                | pC (plasmid)               | CMV             |
| S515        | ePKA-KTR1.4-tdCherry 2a H2B-mTagBFP2                | pC (plasmid)               | CMV             |
| S742        | ePKA-KTR1.5-tdCherry 2a H2B-mTagBFP2                | pC (plasmid)               | CMV             |
| YG63        | ePKA-KTR1.2-tdCherry 2a SS-mTagBFP2-KDEL            | pLenti (lentiviral vector) | CMV             |
| S381        | ePKA-KTR1.2-tdCherry 2a 3xNLS-mTagBFP2              | pC (plasmid)               | CMV             |
| YG61        | ePKA-KTR1.2-mCherry 2a SS-mTagBFP2-KDEL             | pLenti (lentiviral vector) | CMV             |
| YG65        | ePKA-KTR1.4-mCherry 2a SS-mTagBFP2-KDEL             | Lentiviral                 | CMV             |
| YG67        | ePKA-KTR1.4-tdCherry 2a SS-mTagBFP2-KDEL            | Lentiviral                 | CMV             |
| YG8         | ePKA-KTR1.2-mScarlet 2a SS-mTagBFP2-KDEL            | Lentiviral                 | CMV             |
| YG18        | ePKA-KTR1.2-mScarlet-BCR 2a SS-mTagBFP2-KDEL        | Lentiviral                 | CMV             |
| S468        | ERK-KTR1-tdCherry 2a H2B-mTagBFP2                   | pC (plasmid)               | CMV             |
| S712        | eERK-KTR1.1-tdCherry 2a H2B-mTagBFP2                | pC (plasmid)               | CMV             |
| S713        | eERK-KTR1.2-tdCherry 2a H2B-mTagBFP2                | pC (plasmid)               | CMV             |
| S765        | eERK-KTR1.3-tdCherry 2a H2B-mTagBFP2                | pC (plasmid)               | CMV             |
| S940        | eERK-KTR1.2-mScarlet 2a SS-mTagBFP2-KDEL            | Lentiviral                 | CMV             |
| YG21        | eERK-KTR1.2-mScarlet-BCR 2a SS-mTagBFP2-KDEL        | Lentiviral                 | CMV             |
| YG6         | eERK-KTR1.2-emiRFP670 2a SS-mTagBFP2-KDEL           | pLenti (lentiviral vector) | CMV             |
| YG45        | ERK-KTR1-emiRFP670 2a SS-mTagBFP2-KDEL              | pLenti (lentiviral vector) | CMV             |
| YG50        | ePKA-KTR1.2-tdTomato 2a SS-mTagBFP2-KDEL            | pLenti (lentiviral vector) | CMV             |
| YG114       | PKA-KTR3-tdTomato 2a SS-mTagBFP2-KDEL               | pLenti (lentiviral vector) | CMV             |
| YG115       | ePKA-KTR1.4-tdTomato 2a SS-mTagBFP2-KDEL            | pLenti (lentiviral vector) | CMV             |
| S1137       | jGCAMP8s                                            | Lentiviral                 | CMV             |
| YG160       | eERK-KTR1.2 (mutated)-emiRFP670 2a SS-mTagBFP2-KDEL | pLenti (lentiviral vector) | CMV             |

## Structured Methods - Reagents and Tools Table

*Instructions: Please complete the relevant fields below, adding rows as needed. The following page provides an example of a completed table and additional instruction for entering your data in the table.*

| Reagent/Resource                     | Reference or Source   | Identifier or Catalog Number |
|--------------------------------------|-----------------------|------------------------------|
|                                      |                       |                              |
| <b>Experimental Models</b>           |                       |                              |
| HEK-293 cells (H. sapiens)           | ATCC                  | CRL-1573                     |
| Dorsal root ganglion neurons         | C57BL/6 (Jackson Lab) | 000664                       |
| <b>Recombinant DNA</b>               |                       |                              |
| psPAX2                               | Addgene               | 12260                        |
| VSV.G                                | Addgene               | 14888                        |
| PKA-KTR1/tdCherry.2a.H2B-mTagBFP2    | This study            | N/A                          |
| PKA-KTR1/mCherry.2a.H2B-mTagBFP2     | This study            | N/A                          |
| ePKA-KTR1.1/tdCherry.2a.H2B-mTagBFP2 | This study            | N/A                          |
| ePKA-KTR1.2/tdCherry.2a.H2B-mTagBFP2 | This study            | N/A                          |
| ePKA-KTR1.3/tdCherry.2a.H2B-mTagBFP2 | This study            | N/A                          |
| ePKA-KTR1.4/tdCherry.2a.H2B-mTagBFP2 | This study            | N/A                          |
| ePKA-KTR1.5/tdCherry.2a.H2B-mTagBFP2 | This study            | N/A                          |
| ePKA-KTR1.2/mCherry.2a.ER-mTagBFP2   | This study            | N/A                          |
| ePKA-KTR1.4/mCherry.2a.ER-mTagBFP2   | This study            | N/A                          |
| ePKA-KTR1.4/tdCherry.2a.ER-mTagBFP2  | This study            | N/A                          |

|                                                |            |     |
|------------------------------------------------|------------|-----|
| ePKA-KTR1.2/mScarlet-<br>l.2a.ER-mTagBFP2      | This study | N/A |
| ePKA-KTR1.2/mScarlet-<br>l/BCR.2a.ER-mTagBFP2  | This study | N/A |
| ERK-KTR1/tdCherry.2a.H2B-<br>mTagBFP2          | This study | N/A |
| eERK-<br>KTR1.1/tdCherry.2a.H2B-<br>mTagBFP2   | This study | N/A |
| eERK-<br>KTR1.2/tdCherry.2a.H2B-<br>mTagBFP2   | This study | N/A |
| eERK-<br>KTR1.3/tdCherry.2a.H2B-<br>mTagBFP2   | This study | N/A |
| eERK-KTR1.2/mScarlet-<br>l.2a.ER-mTagBFP2      | This study | N/A |
| eERK-KTR1.2/mScarlet-<br>l/BCR.2a.ER-mTagBFP2  | This study | N/A |
| ePKA-<br>KTR1.2/tdCherry.2a.3xNLS-<br>mTagBFP2 | This study | N/A |
| ePKA-<br>KTR1.2/tdCherry.2a.ER-<br>mTagBFP2    | This study | N/A |
| ePKA-<br>KTR1.2/tdTomato.2a.ER-<br>mTagBFP2    | This study | N/A |
| eERK-<br>KTR1.2/emiRFP670.2a.ER-<br>mTagBFP2   | This study | N/A |
| ePKA-<br>KTR1.4/tdTomato.2a.ER-<br>mTagBFP2    | This study | N/A |
| PKA-KTR2/mCherry.2a.H2B-<br>mTagBFP2           | This study | N/A |
| PKA-KTR2/tdCherry.2a.H2B-<br>mTagBFP2          | This study | N/A |
| PKA-KTR3/mCherry.2a.ER-<br>mTagBFP2            | This study | N/A |
| PKA-KTR3/tdCherry.2a.ER-<br>mTagBFP2           | This study | N/A |

|                                                           |                             |            |
|-----------------------------------------------------------|-----------------------------|------------|
| ERK-KTR1/emiRFP670.2a.ER-mTagBFP2                         | This study                  | N/A        |
| Additional plasmids and more information                  | This study                  | Table S1   |
| <b>Antibodies</b>                                         |                             |            |
| Rabbit anti-phospho-ERK1/2                                | Cell Signaling Technology   | 9101S      |
| Rabbit anti-phospho-PKA R2 (Ser99)                        | Abcam                       | ab32390    |
| Goat anti-rabbit Alexa488                                 | Jackson ImmunoResearch      | AB_2338046 |
| <b>Oligonucleotides and other sequence-based reagents</b> |                             |            |
| Geneblocks and primers                                    | Integrated DNA Technologies | Table S1   |
| <b>Chemicals, Enzymes and other reagents</b>              |                             |            |
| Phusion High-Fidelity DNA Polymerase                      | ThermoFisher                | F530L      |
| T4 DNA Ligase (5 U/ $\mu$ L)                              | ThermoFisher                | EL0011     |
| Petri Dishes                                              | Falcon                      | 351029     |
| DMEM, high glucose                                        | ThermoFisher                | 11965118   |
| Trypsin-EDTA (0.25%), phenol red                          | ThermoFisher                | 25200114   |
| Fetal Bovine Serum                                        | ThermoFisher                | 16000044   |
| 24-well cell culture plates                               | Denville                    | 1156F00    |
| TC-treated Culture Dish (100 mm)                          | Corning                     | 430167     |
| Hanks' Balanced Salt Solution (HBSS)                      | ThermoFisher                | 14175103   |
| 96 Well Black Plate, Coverglass Bottom, CC2 Surface       | ThermoFisher                | 160376     |
| $\mu$ -Slide 8 Well high Glass Bottom                     | Ibidi                       | 80807      |
| $\mu$ -Slide 18 Well Glass Bottom                         | Ibidi                       | 81817      |
| A23187                                                    | Sigma-Aldrich               | C7522      |
| ATP                                                       | Sigma-Aldrich               | A26209     |
| Forskolin                                                 | Cayman Chemical             | 11018      |
| H89                                                       | MedChemExpress              | HY-15979A  |
| EGF                                                       | Gibco                       | PHG0311L   |

|                                                |                                                                                                                                                                                                                                                                               |             |
|------------------------------------------------|-------------------------------------------------------------------------------------------------------------------------------------------------------------------------------------------------------------------------------------------------------------------------------|-------------|
| VX-11e                                         | SelleckChem                                                                                                                                                                                                                                                                   | S7709       |
| leptomycin B                                   | Sigma-Aldrich                                                                                                                                                                                                                                                                 | L2913       |
| Phorbol 12-myristate 13-acetate                | Sigma-Aldrich                                                                                                                                                                                                                                                                 | P1585       |
| Neurobasal™ Plus Medium                        | Gibco                                                                                                                                                                                                                                                                         | A3582901    |
| B-27™ Plus Supplement                          | Gibco                                                                                                                                                                                                                                                                         | A3582801    |
| Poly-L-lysine solution                         | Sigma-Aldrich                                                                                                                                                                                                                                                                 | P8920-100ML |
| Laminin                                        | Sigma-Aldrich                                                                                                                                                                                                                                                                 | L2020       |
| Papain, suspension                             | Worthington                                                                                                                                                                                                                                                                   | LS003126    |
| Bovine Serum Albumin                           | Sigma-Aldrich                                                                                                                                                                                                                                                                 | A-9418      |
| TM Liberase                                    | Roche                                                                                                                                                                                                                                                                         | 5401119001  |
| TL Liberase                                    | Roche                                                                                                                                                                                                                                                                         | 5401020001  |
| Pen/Strep (100X)                               | ThermoFisher                                                                                                                                                                                                                                                                  | 15140122    |
| Lipofectamine™ 3000                            | ThermoFisher                                                                                                                                                                                                                                                                  | L3000015    |
| Open-Top Thinwall Ultra-Clear Tube             | Beckman-Coulter                                                                                                                                                                                                                                                               | C14292      |
| 50 mL Luer-Lok™ Syringe                        | BD                                                                                                                                                                                                                                                                            | 309653      |
| Syringe Filter (0.45 µm)                       | Millipore                                                                                                                                                                                                                                                                     | SLHVR33RS   |
| 8-mm cover glasses                             | Electron Microscopy Sciences                                                                                                                                                                                                                                                  | 7229608     |
| QIAprep Spin Miniprep Kit                      | Qiagen                                                                                                                                                                                                                                                                        | 27106       |
| Wizard® Plus Midipreps DNA Purification System | Promega                                                                                                                                                                                                                                                                       | A7640       |
| Ampicillin sodium salt                         | Sigma-Aldrich                                                                                                                                                                                                                                                                 | A8351       |
| <b>Software</b>                                |                                                                                                                                                                                                                                                                               |             |
| GraphPad Prism 10                              | <a href="https://www.graphpad.com/">https://www.graphpad.com/</a>                                                                                                                                                                                                             |             |
| SnapGene 7                                     | <a href="https://www.snapgene.com/">https://www.snapgene.com/</a>                                                                                                                                                                                                             |             |
| ImageJ (Fiji)                                  | <a href="https://fiji.sc/">https://fiji.sc/</a>                                                                                                                                                                                                                               |             |
| NIS Elements Advanced Research v4.60           | <a href="https://www.microscope.healthcare.nikon.com/products/software/nis-elements">https://www.microscope.healthcare.nikon.com/products/software/nis-elements</a>                                                                                                           |             |
| EVOS M7000 Cell Imaging System Software        | <a href="https://www.thermofisher.com/us/en/home/technical-resources/software-downloads/evos-m7000-imaging-system-software-download.html">https://www.thermofisher.com/us/en/home/technical-resources/software-downloads/evos-m7000-imaging-system-software-download.html</a> |             |
| <b>Other</b>                                   |                                                                                                                                                                                                                                                                               |             |
| EVOS M7000 Imaging System                      | ThermoFisher                                                                                                                                                                                                                                                                  | AMF7000     |

|                              |                 |         |
|------------------------------|-----------------|---------|
| EVOS Onstage Incubator       | ThermoFisher    | AMC2000 |
| Optima L-90K ultracentrifuge | Beckman-Coulter |         |
| SW-32 Ti rotor               | Beckman-Coulter |         |
| Sony MA900 Cell Sorter       | Sony            |         |
